# Supplementary material for: Detection of a Multiple Circulation Event of Dengue Virus 2 Strains in the Northern Region of Brazil
Source: MDPI journal article supplement (doi:10.3390/tropicalmed9010017), 2024-01-09
Supplement: s1 [file s1]

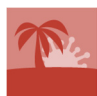

# Detection of a Multiple Circulation Event of Dengue Virus 2 Strains in the Northern Region of Brazil

## Supplementary Materials:

**Table S1.** List of selected samples in the study.

| #  | FU | ID       | CD         | Serotype | Sample | CT Value   |
|----|----|----------|------------|----------|--------|------------|
| 1  | TO | OR609396 | 28/10/2017 | Dengue 2 | Serum  | 14,3       |
| 2  | RO | OR609397 | 26/07/2019 | Dengue 2 | Serum  | 21,4       |
| 3  | RO | OR609398 | 11/11/2019 | Dengue 2 | Serum  | 21,6       |
| 4  | RO | OR609399 | 09/12/2019 | Dengue 2 | Serum  | 22,1       |
| 5  | RO | OR609400 | 10/12/2019 | Dengue 2 | Serum  | 23,4       |
| 6  | RO | OR609411 | 26/01/2020 | Dengue 2 | Serum  | 20,7       |
| 7  | RO | OR609404 | 07/02/2020 | Dengue 2 | Serum  | 22,7       |
| 8  | RO | OR609405 | 17/01/2020 | Dengue 2 | Serum  | 22,1       |
| 9  | RO | OR609406 | 29/01/2020 | Dengue 2 | Serum  | 29,4       |
| 10 | RO | OR609407 | 06/02/2020 | Dengue 2 | Serum  | 24,07      |
| 11 | RO | OR609408 | 31/01/2020 | Dengue 2 | Serum  | 24,5       |
| 12 | RO | OR609412 | 30/01/2020 | Dengue 2 | Serum  | 21,6       |
| 13 | RO | OR609403 | 07/02/2020 | Dengue 2 | Serum  | 21,7       |
| 14 | RO | OR609410 | 18/02/2020 | Dengue 2 | Serum  | 23,7       |
| 15 | RO | OR609413 | 10/02/2020 | Dengue 2 | Serum  | 25,7       |
| 16 | RO | OR609414 | 12/02/2020 | Dengue 2 | Serum  | 19,7       |
| 17 | RO | OR609415 | 10/02/2020 | Dengue 2 | Serum  | 20,3       |
| 18 | RO | OR609417 | 10/02/2020 | Dengue 2 | Serum  | 20,6       |
| 19 | RO | OR609409 | 29/01/2020 | Dengue 2 | Serum  | 25,3       |
| 20 | RO | OR609416 | 07/01/2020 | Dengue 2 | Serum  | 22,1       |
| 21 | AC | OR609401 | 25/01/2020 | Dengue 2 | Serum  | 20,2       |
| 22 | AC | OR609402 | 09/01/2020 | Dengue 2 | Serum  | Unrealized |
| 23 | AC | OR609421 | 15/01/2021 | Dengue 2 | Serum  | 15,7       |
| 24 | AC | OR609418 | 11/01/2021 | Dengue 2 | Serum  | 17,8       |
| 25 | AC | OR609419 | 20/01/2021 | Dengue 2 | Serum  | Unrealized |
| 26 | AC | OR609420 | 15/01/2021 | Dengue 2 | Serum  | 16,9       |
| 27 | AC | OR609422 | 25/01/2021 | Dengue 2 | Serum  | 19,3       |
| 28 | AC | OQ511272 | 24/02/2021 | Dengue 2 | Serum  | 19,9       |
| 29 | AC | OQ511275 | 26/02/2021 | Dengue 2 | Serum  | 19,8       |
| 30 | AC | OQ511273 | 10/03/2021 | Dengue 2 | Serum  | 17,9       |
| 31 | AC | OQ511271 | 01/02/2021 | Dengue 2 | Serum  | 17,1       |
| 32 | AC | OQ511274 | 27/02/2021 | Dengue 2 | Serum  | 15,5       |

**Table S2.** - List of sequences included in phylogenetic inference.

| Access Number | Country | Collection Date | Genotype     | Lineage |
|---------------|---------|-----------------|--------------|---------|
| OQ511273      | Brazil  | 10-03-2021      | Cosmopolitan | 5       |
| OQ511271      | Brazil  | 01-02-2021      |              |         |
| OQ511274      | Brazil  | 27-02-2021      |              |         |
| OQ511272      | Brazil  | 24-02-2021      |              |         |
| OQ511275      | Brazil  | 26-02-2021      |              |         |
| OR609420      | Brazil  | 15-01-2021      |              |         |
| OR609419      | Brazil  | 20-01-2021      |              |         |
| OR609422      | Brazil  | 25-01-2021      |              |         |
| OR609418      | Brazil  | 11-01-2021      |              |         |
| OR609421      | Brazil  | 15-01-2021      |              |         |
| OM744143      | Brazil  | 29-11-2021      |              |         |

| Access Number | Country          | Collection Date | Genotype | Lineage |
|---------------|------------------|-----------------|----------|---------|
| OM791800      | Peru             | 2019            |          |         |
| OM791801      | Peru             | 2019            |          |         |
| LC436672      | Bangladesh       | 2017            |          |         |
| MN328061      | Bangladesh       | 2019            |          |         |
| LC436673      | Bangladesh       | 2017            |          |         |
| LC436674      | Bangladesh       | 2017            |          |         |
| MW512387      | Singapore        | 2013            |          |         |
| LC410191      | Thailand         | 2017            |          |         |
| KU517847      | Philippines      | 2015            |          |         |
| KX372564      | Australia        | 2015            |          |         |
| KX452040      | Malaysia         | 2014            |          |         |
| MK564480      | China            | 2016            |          |         |
| MH110588      | China            | 2017            |          |         |
| MW512491      | Singapore        | 2019            |          |         |
| MK513444      | Singapore        | 2015            |          |         |
| EU179857      | Brunei           | 2005            |          |         |
| KC762669      | Indonesia        | 2007            |          |         |
| HM488257      | Guam             | 2001            |          |         |
| KX380830      | Singapore        | 2013            |          |         |
| KX380819      | Singapore        | 2012            |          |         |
| KX380809      | Singapore        | 2012            |          |         |
| KY921904      | Singapore        | 2014            |          | 4       |
| MW512379      | Singapore        | 2012            |          |         |
| KX380836      | Singapore        | 2013            |          |         |
| KU517846      | Indonesia        | 2014            |          |         |
| MW512466      | Singapore        | 2016            |          |         |
| AY858036      | Indonesia        | 2004            |          |         |
| MK578532      | China            | 2016            |          |         |
| MW512354      | Singapore        | 2009            |          |         |
| KM279597      | Singapore        | 2012            |          |         |
| JN851113      | Singapore        | 2006            |          | 2       |
| KM279604      | Singapore        | 2008            |          |         |
| KU509272      | Thailand         | 2009            |          |         |
| KC762660      | Indonésia        | 2007            |          |         |
| KX452015      | Malásia          | 2014            |          |         |
| KC762678      | Indonésia        | 2010            |          |         |
| MW512414      | Singapore        | 2014            |          |         |
| KU517845      | Papua New Guinea | 2013            |          |         |
| MH985858      | Australia        | 2016            |          |         |
| KC762658      | Indonesia        | 2007            |          |         |
| EU081177      | Singapore        | 2005            |          | -       |
| EU081180      | Singapore        | 2005            |          |         |
| JN851124      | Singapore        | 2005            |          |         |
| KC762672      | Indonesia        | 2008            |          | -       |
| KC762680      | Indonesia        | 2010            |          | -       |
| JX470186      | China            | 2010            |          | 3       |
| EU482640      | Vietnam          | 2006            |          |         |
| EU179859      | Brunei           | 2006            |          |         |
| MW512376      | Singapore        | 2012            |          |         |
| KT187557      | China            | 2014            |          |         |
| MG189962      | Tanzania         | 2014            |          |         |
| AY858035      | Indonesia        | 2004            |          |         |

| Access Number | Country          | Collection Date | Genotype       | Lineage              |
|---------------|------------------|-----------------|----------------|----------------------|
| KU365902      | Taiwan           | 2015            |                |                      |
| MW512450      | Singapore        | 2016            |                |                      |
| MF004385      | France           | 2014            |                |                      |
| AY037116      | Australia        | 1993            |                |                      |
| KC964094      | China            | 1993            |                |                      |
| EF051521      | China            | 2001            |                | -                    |
| KU509274      | Philippines      | 2010            |                | -                    |
| KF744397      | Philippines      | 2001            |                | 1                    |
| MW512489      | Singapore        | 2018            |                |                      |
| DQ645553      | Taiwan           | 2002            |                |                      |
| DQ645554      | Taiwan           | 2002            |                |                      |
| KF744398      | Filipinas        | 2005            |                |                      |
| JN851131      | Singapore        | 2005            |                |                      |
| MW512409      | Singapore        | 2013            |                |                      |
| AB189122      | Indonesia        | 1998            |                |                      |
| GQ398264      | Indonesia        | 1976            |                |                      |
| EU056810      | Burkina Faso     | 1983            |                |                      |
| GU131843      | Burkina Faso     | 1986            |                | -                    |
| GQ398262      | Indonesia        | 1976            |                | -                    |
| KJ830750      | Saudi Arabia     | 2014            |                | -                    |
| KJ010186      | Pakistan         | 2013            |                | -                    |
| GQ252677      | Sri Lanka        | 2003            |                | Indian Sub-continent |
| MF156247      | China            | 2015            |                |                      |
| MH110592      | China            | 2017            |                |                      |
| MH822948      | India            | 2012            |                |                      |
| JQ955623      | India            | 2009            |                |                      |
| MW512372      | Singapore        | 2012            |                |                      |
| MW512490      | Singapore        | 2019            |                |                      |
| MG779194      | Kenya            | 2017            |                |                      |
| KY672948      | China            | 2013            |                |                      |
| KY849763      | Laos             | 2010            |                |                      |
| DQ181797      | Thailand         | 2001            | Asian I        | -                    |
| GU131897      | Camboja          | 2007            |                | -                    |
| FM210211      | Vietnam          | 2003            |                | -                    |
| DQ181798      | Thailand         | 1999            |                | -                    |
| GQ868545      | Thailand         | 1996            |                | -                    |
| DQ181802      | Thailand         | 1988            |                | -                    |
| DQ181805      | Thailand         | 1979            |                | -                    |
| AJ487271      | Thailand         | 1974            |                | -                    |
| NC_001474     | Thailand         | 1964            |                | -                    |
| HQ891023      | Taiwan           | 2008            |                | -                    |
| HQ891024      | Taiwan           | 2008            |                | -                    |
| AF204177      | China            | 1989            | Asian II       | -                    |
| AF038403      | Papua New Guinea | 1944            |                | -                    |
| FJ906959      | Papua New Guinea | 2008            |                | -                    |
| KF704358      | Cuba             | 1981            |                | -                    |
| KF744400      | Philippines      | 2000            |                | -                    |
| KF744407      | Philippines      | 1996            |                | -                    |
| KJ734727      | Taiwan           | 2014            |                | -                    |
| EU482600      | Nicaragua        | 2005            |                | -                    |
| OR609399      | Brazil           | 09-12-2019      |                | -                    |
| OR609415      | Brazil           | 10-02-2020      | Asian-American | -                    |

| Access Number | Country          | Collection Date | Genotype | Lineage |
|---------------|------------------|-----------------|----------|---------|
| OR609400      | Brazil           | 10-12-2019      |          | -       |
| OR609413      | Brazil           | 10-02-2020      |          | -       |
| OR609416      | Brazil           | 10-02-2020      |          | -       |
| OR609406      | Brazil           | 29-01-2020      |          | -       |
| OR609410      | Brazil           | 18-02-2020      |          | -       |
| OR609414      | Brazil           | 12-02-2020      |          | -       |
| OR609403      | Brazil           | 07-02-2020      |          | -       |
| OR609401      | Brazil           | 25-01-2020      |          | -       |
| OR609402      | Brazil           | 09-01-2020      |          | -       |
| OR609409      | Brazil           | 29-01-2020      |          | -       |
| OR609398      | Brazil           | 11-11-2019      |          | -       |
| OR609405      | Brazil           | 17-01-2020      |          | -       |
| OR609407      | Brazil           | 06-02-2020      |          | -       |
| OR609417      | Brazil           | 10-02-2020      |          | -       |
| OR609397      | Brazil           | 26-07-2019      |          | -       |
| OR609408      | Brazil           | 31-01-2020      |          | -       |
| OR609412      | Brazil           | 30-01-2020      |          | -       |
| OR609411      | Brazil           | 26-01-2020      |          | -       |
| OR609404      | Brazil           | 07-02-2020      |          | -       |
| OR609396      | Brazil           | 28-10-2017      |          | -       |
| GQ199868      | Nicaragua        | 2007            |          | -       |
| FJ898461      | Belize           | 2002            |          | -       |
| AY702036      | Cuba             | 1997            |          | -       |
| EU687217      | Puerto Rico      | 2005            |          | -       |
| GQ868596      | Venezuela        | 1991            |          | -       |
| JX669488      | Brasil           | 2002            |          | -       |
| GQ868540      | Venezuela        | 1990            |          | -       |
| EU569704      | Puerto Rico      | 1986            |          | -       |
| GQ398290      | Puerto Rico      | 1994            |          | -       |
| JN819418      | Vietnam          | 1988            |          | -       |
| AF119661      | China            | 1985            |          | -       |
| DQ181801      | Thailand         | 1990            |          | -       |
| AF100469      | México           | 1992            |          | -       |
| GQ868589      | México           | 1983            |          | -       |
| EU056811      | Peru             | 1995            | American | -       |
| GQ868592      | Colombia         | 1986            |          | -       |
| HM582107      | American Samoa   | 1972            |          | -       |
| HM582110      | French Polynesia | 1973            |          | -       |
| HM582117      | Tonga            | 1974            |          | -       |
| EU056812      | Puerto Rico      | 1977            |          | -       |
| GQ398257      | Indonesia        | 1977            |          | -       |

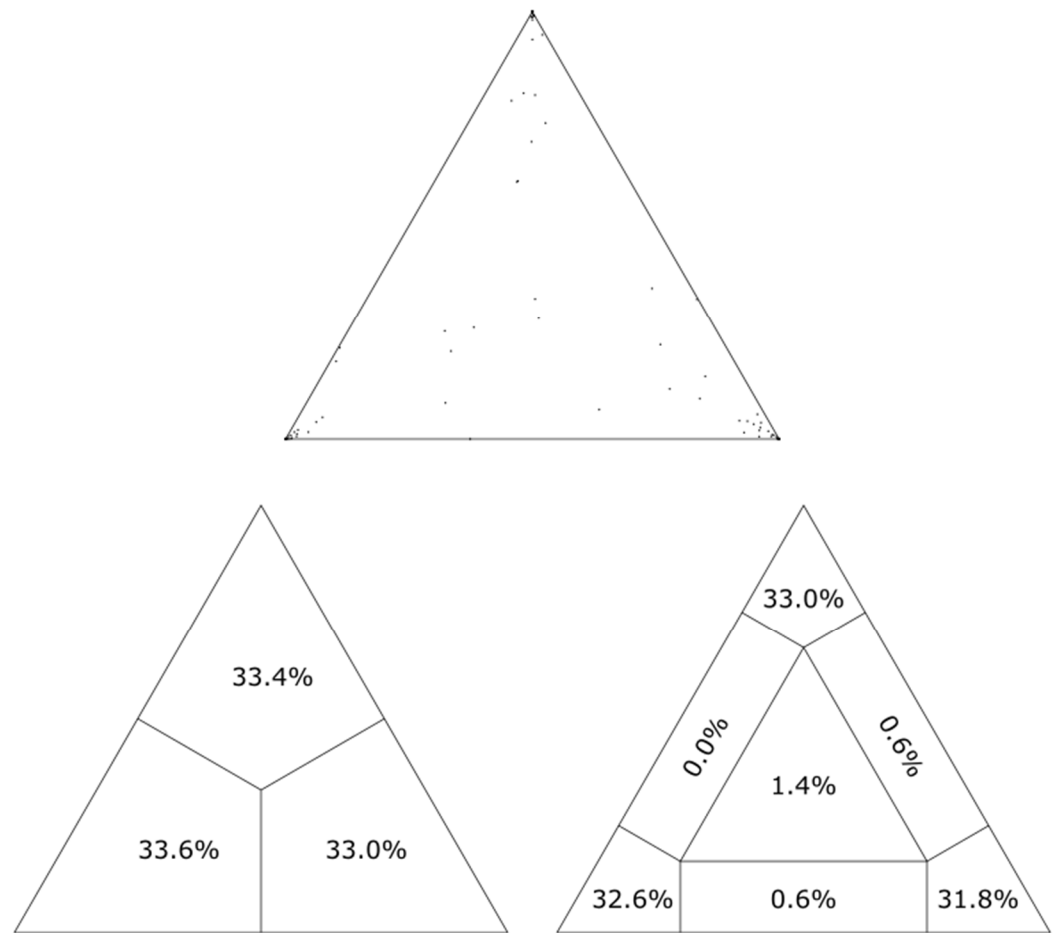

**Figure S1.** Representation of the positive phylogenetic signal for the set of studied sequences.
